## Halothane-Oxidant Interactions in the Ex Vivo Perfused Rabbit Lung

### Fluid Conductance and Eicosanoid Production

Jay R. Shayevitz, M.D.,\* Kent J. Johnson, M.D.,† Paul R Knight, M.D., Ph.D.‡

**Background:** The present studies were undertaken to determine the interactions between halothane and oxidative injury with respect to endothelial integrity, as measured by pulmonary capillary filtration coefficient ( $K_{fc}$ ), and production of arachidonic acid-derived mediators, in perfused rabbit lungs challenged with the oxidant *tert*-butyl-hydroperoxide (*t*-bu-OOH).

**Methods:** Isolated lungs were prepared from 27 New Zealand white rabbits (2–3 kg) and were perfused with  $Ca^{2+}$ -free Krebs-Henseleit buffer solution. In group A ( $n = 9$ ), lungs were ventilated with halothane 2.5% in carrier gas (5%  $CO_2$  in air); in group B ( $n = 9$ ), with carrier gas alone; and in group C ( $n = 9$ ), with carrier gas, but without injury. The lungs in the two injury groups (A and B) received four infusions of *t*-bu-OOH, 200  $\mu M$ , over 1 min, directly into the pulmonary artery. The uninjured lungs received four infusions of vehicle (normal saline).  $K_{fc}$  was determined after each *t*-bu-OOH infusion. Concentrations of thromboxane  $B_2$  ( $TxB_2$ ) and 6-keto-prostaglandin  $F_{1\alpha}$  were measured in samples of effluent perfusate obtained before and 30 s after the end of each infusion of *t*-bu-OOH. The wet/dry weight ratio of each pair of lungs was determined at the end of each experiment.

**Results:**  $K_{fc}$  progressively increased after each infusion of oxidant in group A when compared with the other two groups. Lung wet/dry ratios were elevated in group A ( $14.3 \pm 0.7$ ) and group B ( $13.2 \pm 0.2$ ) compared with group C ( $12.1 \pm 1.1$ ).  $TxB_2$  production in group A ( $2206 \pm 263$  pg  $\cdot$  min $^{-1} \cdot$  g $^{-1}$  dry lung

tissue) was greater than in group B ( $1413 \pm 127$ ) by the final infusion of *t*-bu-OOH.

**Conclusions:** *Ex vivo* perfused rabbit lungs ventilated with halothane exhibited, simultaneously, evidence of greater fluid conductance across the pulmonary capillary bed and production of thromboxane  $A_2$  when challenged with oxidant than did lungs ventilated with carrier gas. Both of these effects may be mediated by halothane-related enhancement of intracellular endothelial  $Ca^{2+}$  mobilization stimulated by intrapulmonary infusion of oxidant. (Key words: Anesthetics, volatile: halothane. Lung metabolism. Prostaglandins: 6-keto-prostaglandin  $F_{1\alpha}$ ; thromboxane  $B_2$ . Respiratory distress syndrome, adult. Species: rabbit.)

VOLATILE anesthetics may modulate the intensity of lung inflammatory injury of both infectious and non-infectious origins. Recent studies have demonstrated: (1) decreased pulmonary vascular endothelial resistance to injury by activated neutrophils in the presence of halothane and isoflurane,<sup>1</sup> (2) increased alveolar-capillary permeability after acid aspiration lung injury in rats exposed to halothane or isoflurane,<sup>2</sup> and (3) altered lung pathology in mice infected with influenza A virus and exposed to either halothane or isoflurane.<sup>3</sup> Inhalation anesthetics also enhance the pressor effect of the organic oxidant *tert*-butyl-hydroperoxide (*t*-bu-OOH) in the *ex vivo* perfused rabbit lung.<sup>4</sup> The enhanced pressor response is accompanied by augmented recovery of thromboxane  $A_2$  ( $TxA_2$ ) from pulmonary venous effluent after challenge with *t*-bu-OOH. This effect may occur because the highly lipid-soluble inhalational anesthetic agents displace cell membrane phospholipids, making them more available for hydrolysis.<sup>5</sup> Arachidonic acid metabolites may act as markers of lung injury and may aid in lung adaptation to injury.<sup>6,7</sup> Substances that inhibit the production of arachidonic acid metabolites or inhibit activation of arachidonic acid metabolic pathways may result in modulation of physiologic lung responses to injury or perturbation,<sup>8-11</sup> yet the contribution of arachidonate

\* Assistant Professor of Anesthesiology, University of Michigan Medical School.

† Professor of Pathology, University of Michigan Medical School.

‡ Professor and Chair, Department of Anesthesiology, State University of New York at Buffalo School of Medicine and Biomedical Sciences.

Received from the Departments of Anesthesiology and Pathology, The University of Michigan Medical School, Ann Arbor, Michigan. Accepted for publication March 18, 1993. Supported by Public Health Service grant R23-GM38434 (JRS). Presented in part at the annual meeting of the American Society of Anesthesiologists, San Francisco, California, October 26–30, 1991.

Address reprint requests to Dr. Shayevitz: Department of Anesthesiology, C-4139 Med Inn Bridge, Box 0800, The University of Michigan Medical School, 1500 East Medical Center Drive, Ann Arbor, Michigan 48109-0800.

metabolites to the process of injury itself remains unclear and varies from species to species.<sup>7</sup>

Infusion of *t*-bu-OOH into the *ex vivo* perfused lung induces diffuse injury and, subsequently, high permeability pulmonary edema in an experimental model of adult respiratory distress syndrome.<sup>4,12</sup> The oxidant *t*-bu-OOH may produce injury by initiation of lipid peroxidation chain reactions within cell membranes.<sup>13</sup> Although readily scavenged by glutathione peroxidase, *t*-bu-OOH is highly lipid-soluble and may interact in the hydrophobic regions of cell membranes with Fe<sup>2+</sup> and Fe<sup>3+</sup> complexes to initiate lipid peroxidation and fatty acid chain lengthening and branching.<sup>13</sup> Such oxidant-mediated alterations in membrane lipid structure eventually may change membrane properties, such as fluidity, or the functions of proteins, such as receptors and ion channels, which are intercalated in the membrane structure and usually act as lipid chain interrupters, helping to maintain membrane fluidity.<sup>13</sup>

Because of the previously demonstrated interactions between inhalational anesthetics and lung inflammatory injury,<sup>1-4</sup> we undertook the following experiments to determine whether halothane will change the susceptibility of the alveolar capillary barrier in the *ex vivo* perfused lung to injury by *t*-bu-OOH. This effect was measured by calculating the pulmonary capillary filtration coefficient ( $K_{fc}$ ), a measure of the relative rate of fluid conductance across the microvascular bed.<sup>14</sup> The biochemical interaction between *t*-bu-OOH administration and halothane was detected by measurement of metabolites of the eicosanoid mediators TxA<sub>2</sub> and prostacyclin in effluent perfusate.

## Materials and Methods

### *Preparation of the Isolated Perfused Rabbit Lung*

Appropriate approval was obtained from institutional animal use committees for the experimental procedures. Male New Zealand white rabbits weighing 2–3 kg (Langshaw Rabbitry, Grand Rapids, MI) were maintained on Carnation Family Rabbit Chow (St. Louis, MO) and allowed water *ad libitum*. On the day of the experiment, a marginal ear vein was cannulated and 1,000 U/kg heparin was administered. Anesthesia was

induced with 10 mg/kg ketamine and 2–3 mg/kg xylazine, administered intravenously.

A small left thoracotomy was made and the rabbit was exsanguinated by withdrawal of blood from the left and right ventricles, after which the chest was opened widely by means of a right thoracotomy and a midline incision with removal of the sternum. A tracheotomy was performed, and a stainless steel cannula was secured in the trachea with umbilical tape. Stainless steel cannulas were secured in the pulmonary artery, through a right ventriculostomy, and in the left atrium. The umbilical tape securing the pulmonary artery also included the aorta, thus eliminating flow through the bronchial circulation.

The lungs were ventilated with a mixture of 5% CO<sub>2</sub> in air (carrier gas), at a frequency of 20 breaths/min and a peak inspiratory pressure of 10–12 mmHg, with 1–2 mmHg positive end-expiratory pressure. After initiation of ventilation, the lungs were perfused with approximately 200 ml Ca<sup>2+</sup>-free Krebs-Henseleit buffer solution (118 mM NaCl, 4.7 mM KCl, 1.2 mM MgSO<sub>4</sub>, 1.2 mM NaH<sub>2</sub>PO<sub>4</sub>, 25 mM NaHCO<sub>3</sub>, 11.1 mM glucose, and 4 mM ethylene glycol bis(β-aminoethylether) N,N,N',N'-tetraacetic acid [EGTA]; pH adjusted to 7.4) at 35 ml/min with a roller pump (Sarns, Ann Arbor, MI) to clear the lungs of blood, followed by continuous perfusion with the same buffer in a recirculating fashion, also at 35 ml/min. This procedure reduced the perfusate hemoglobin concentration to levels undetectable using a hemoximeter (Model OSM3, Radiometer, Copenhagen, Denmark). The relatively low initial flow rate of 35 ml/min was chosen for the current experiments because this rate was used successfully in other experiments employing the same model.<sup>8-10,12</sup> In earlier experiments using this methodology and protocol, the lungs were perfused with buffer containing 2.5 mM Ca<sup>2+</sup> and no EGTA. Attenuation of the pulmonary arterial pressor response to infusion of *t*-bu-OOH occurred in lungs ventilated with halothane relative to lungs ventilated with carrier gas.  $K_{fc}$  did not increase in lungs in the former group compared with lungs in the latter group. We speculated that, in these previous experiments, the attenuation of oxidant-induced pressor response by halothane protected the lungs against edema formation. The Ca<sup>2+</sup>-free perfusate used in the present experiments completely eliminated the oxidant-mediated pressor response, thus removing this confounding hemodynamic variable. The perfusate was recirculated through a pulmonary venous reservoir suspended from a strain gauge (Grass model FT-10,

§ Shayevitz JR, Wade DD: Halothane and thiopental attenuate oxidant-induced pulmonary hypertension and edema formation in the isolated perfused rabbit lung (abstract). *ANESTHESIOLOGY* 69:A855, 1988.

## HALOTHANE-OXIDANT INTERACTIONS IN THE RABBIT LUNG

Quincy, MA). The perfusate in the reservoir was bubbled gently with the same gas mixture used to ventilate the lungs, and the reservoir itself was covered with a snugly-fitting lid. The following values were recorded on a Gould 2600S polygraph (Cleveland, OH): pulmonary artery pressure ( $P_{pa}$ ), pulmonary venous pressure ( $P_v$ ), proximal airway pressure ( $P_{aw}$ ), and pulmonary venous reservoir weight ( $W_L$ ), which is a measure of lung water uptake. Perfusate temperature was maintained between 36° and 38° C by means of a heated water bath (fig. 1).  $P_v$  was initially maintained at -5 mmHg by adjusting the height of the pulmonary venous reservoir.

### Experimental Protocol

Twenty-seven animals were used in these studies. At the end of a 20–30 min equilibration period when  $P_{pa}$  had stabilized, the perfusate flow rate was increased to 105 ml/min and  $P_v$  raised to +5 mmHg.<sup>15</sup> This flow rate (35 ml/kg/min) was chosen because (given the constraints of maximum pump rotor head speed and tubing size) tripling the baseline flow rate ensured an adequate and consistent  $P_{pa}$  difference. Matalon and

Cesar (whose model ours imitates to some degree) used a flow rate approximately 20% higher during measurements of  $K_{fc}$ , which was, however, only twice their baseline flow.<sup>16</sup> At  $P_{aw}$  at which the lungs were ventilated, the mean  $P_{aw}$  was 3–4 mmHg (as noted on the chart recorder). Thus mean  $P_v$  was greater than mean  $P_{aw}$ , creating a zone 3 configuration, in which flow is independent of alveolar pressure. This  $P_v$  also produced, at least for the baseline recordings, a constant rate of fluid loss from the pulmonary venous reservoir. The  $W_L$  was recorded for 3 min, after which the flow was reduced to 35 ml/min until  $P_{pa}$  stabilized (usually 30 s). Subsequently,  $P_v$  was readjusted to -5 mmHg. A sample of perfusate was then withdrawn from the venous effluent and an infusion of *t*-bu-OOH was begun directly into the pulmonary artery at a final perfusate concentration of 200  $\mu$ M for 1 min. Another sample of venous effluent was obtained 30 s after the *t*-bu-OOH infusion was stopped. We obtained perfusate samples at this time because earlier experiments demonstrated peak recovery of mediators from the pulmonary venous effluent approximately 30 s after cessation of the oxidant infusion.<sup>12</sup> These maneuvers were repeated three more times over the course of the experiment, with approximately 15 min elapsing between *t*-bu-OOH infusions. Previous experiments had shown that  $P_{pa}$  stabilized 5–7 min after the end of each *t*-bu-OOH infusion.<sup>4,10,12</sup> In no instance was  $P_{pa}$  changed by *t*-bu-OOH in  $Ca^{2+}$ -free perfusate. Just before the second increase in flow and  $P_v$ , simultaneous perfusate samples from the arterial inflow and the venous effluent were obtained from each experimental preparation for determination of pH, partial pressure of oxygen, and carbon dioxide tension with a Radiometer model ABL2 blood gas laboratory (Copenhagen, Denmark).

Lungs were treated in three ways. In group A ( $n = 9$ ), lungs were ventilated with 2.5% halothane in carrier gas throughout the experiment, by means of a calibrated vaporizer (Fluotec Mark II, Cyprane, Keighley, England) filled with commercially available liquid halothane; in group B ( $n = 9$ ), lungs were ventilated with carrier gas alone; and in group C ( $n = 9$ ), lungs were ventilated with carrier gas alone and received infusions of vehicle (normal saline) rather than *t*-bu-OOH. The latter group formed the time controls for this series of experiments. Inspired halothane concentrations were confirmed with an infrared absorption gas analyzer (Traverse Medical Monitors, Traverse City, MI). All groups were treated concurrently but in sequence.

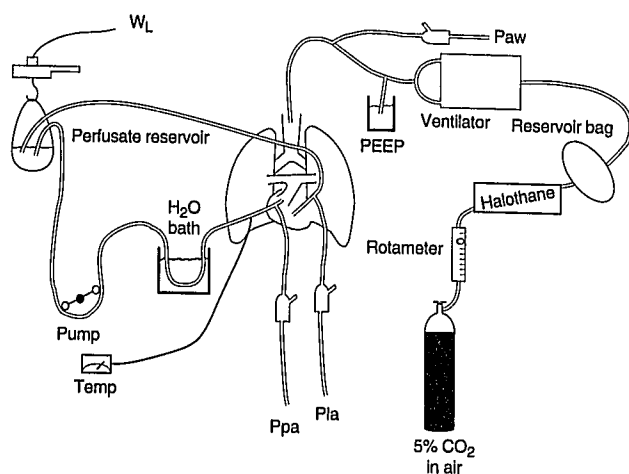

Fig. 1. Diagram of the isolated perfused rabbit lung model used in these experiments.  $P_{aw}$  = proximal airway pressure;  $P_{pa}$  = pulmonary artery pressure;  $P_{pv}$  = pulmonary venous pressure;  $W_L$  = reservoir weight; PEEP = positive end-expiratory pressure. Perfusate circulates through the pulmonary vasculature by means of a roller pump (pump). Perfusate temperature (temp) is monitored at the pulmonary artery, and maintained at 36–38° C by means of a heated water bath ( $H_2O$  bath). A pulmonary venous reservoir (perfusate reservoir) suspended from a strain gauge acts as a monitor of lung water uptake. An in-line halothane vaporizer (halothane) is used to administer volatile anesthetic when appropriate.

At the end of the perfusion, the lungs were dissected from the thoracic cavity *en bloc*, and the trachea was excised 2–3 mm above the carina. After connective tissue and fat were removed, the lungs were weighed wet, dried to a constant weight (36–72 h) at 60–80° C, and reweighed. After each infusion of *t*-bu-OOH,  $K_{fc}$  was calculated using the method described by Matalon and Nickerson,<sup>15</sup> with the following formula:

$$K_{fc}(\text{mL} \cdot \text{min} \cdot \text{mmHg} \cdot 100 \text{ g dry tissue}) = \left( \frac{\frac{\Delta W_L \cdot 1.3}{\Delta P_{pa}}}{\text{Dry lung weight}} \right) \cdot 100,$$

where  $\Delta W_L$  is the change in reservoir weight over the final minute of the 3-min period of elevated  $P_v$ ;  $\Delta P_{pa}$  is the difference in  $P_{pa}$  when the flow is 105 ml/min and then subsequently lowered to 35 ml/min; and 1.3 is the assumed ratio of pulmonary arterial to capillary pressure. The units of  $K_{fc}$  indicate that this coefficient expresses a rate of lung water uptake relative to an approximation of intracapillary hydrostatic pressure present at the time of measurement.

#### Mediator Assays

Concentrations of thromboxane  $B_2$  ( $\text{TxB}_2$ ), the stable metabolite of  $\text{TxA}_2$ , and 6-keto-prostaglandin  $F_{1\alpha}$  (6-keto-PGF $_{1\alpha}$ ), the stable hydrolysis product of prostacyclin, were determined in the samples of venous effluent by means of radioimmunoassays performed by the Michigan Diabetes Research and Training Center (University of Michigan, Ann Arbor, MI). The assay for  $\text{TxB}_2$ <sup>17</sup> employs a tritiated tracer (DuPont-New England Nuclear, Wilmington, DE), a rabbit-derived anti- $\text{TxB}_2$  antibody (Upjohn Company, Kalamazoo, MI), and dextran-coated charcoal for separation. The limit of sensitivity for the assay is 5 pg/ml. Interassay and intraassay variabilities are 8.0% and 2.8%, respectively. The crossreactivity of the anti- $\text{TxB}_2$  antibody is 1.5% for PGD $_2$  and less than 0.6% for all other relevant cyclooxygenase-derived arachidonic acid metabolites. The assay for 6-keto-PGF $_{1\alpha}$  (code RPA.515, Amersham Corporation, Arlington Heights, IL) employs a magnetic double-antibody technique, in which 6-keto-PGF $_{1\alpha}$ -[<sup>125</sup>I]-iodotyrosine is used as the tracer. A rabbit-derived anti-6-keto-PGF $_{1\alpha}$  antibody is the first antibody; and a donkey anti-rabbit serum second antibody, coated onto magnetizable polymer particles, is used for separation of free and bound ligand. The sensitivity limit of this assay is 15 pg/ml, and interassay and intraassay varia-

bilities are 18.7% and 3.3%, respectively. Crossreactivity of the first antibody is 1% or less for prostaglandin  $F_{2\alpha}$ , prostaglandin  $E_2$ , prostaglandin  $F_{1\alpha}$ , prostaglandin  $E_1$ , and  $\text{TxB}_2$ . The rates of production of  $\text{TxB}_2$  and 6-keto-PGF $_{1\alpha}$  were calculated as follows:

$$\text{Rate of production (pg} \cdot \text{min}^{-1} \cdot \text{g}^{-1} \text{ dry tissue)} = \frac{(\text{mediator}_{\text{post}} - \text{mediator}_{\text{pre}}) \cdot 35}{\text{Dry lung weight}},$$

where  $\text{mediator}_{\text{post}}$  and  $\text{mediator}_{\text{pre}}$  represent the mediator concentration (pg/ml) after and before *t*-bu-OOH infusion, and 35 is the perfusate flow rate (ml/min) at the time the samples were obtained.

#### Statistical Analysis

All data are expressed as mean  $\pm$  SE. Analysis of variance was used to compare groups. Scheffé's or Dunnett's test was used for *post hoc* comparisons where appropriate. When  $\alpha \geq 95\%$  ( $P \leq 0.05$ ), differences between groups were considered significant.

#### Results

No  $P_{pa}$  elevation was seen during perfusion with  $\text{Ca}^{2+}$ -free buffer, as demonstrated by a sample of a trace from a representative experiment, in which the lungs were injured with *t*-bu-OOH (fig. 2b). This trace is contrasted with one obtained from a representative experiment performed with Krebs-Henseleit buffer solution containing 2.5 mM  $\text{Ca}^{2+}$ , in which a marked transient elevation in  $P_{pa}$  is evident accompanying infusion of oxidant (fig. 2a). Baseline  $P_{pa}$  was similar in all groups of lungs, as was  $P_{pa}$  just before each of the four infusions of oxidant. Table 1 lists the values for  $P_{pa}$  during zone 3 conditions after each infusion of *t*-bu-OOH, when  $P_v$  and perfusate flow rate were elevated for determination of  $K_{fc}$ . All values were similar, and the presence of halothane had no effect.

Figure 3 is a plot of the mean percent change in  $K_{fc}$  over the *t*-bu-OOH infusion number for the treatment groups (injury plus halothane, injury plus carrier gas, and no injury plus carrier gas). Table 2 gives the absolute values for the mean  $K_{fc}$  obtained for all four infusions of *t*-bu-OOH in the three treatment groups.  $K_{fc}$  increased in a linear fashion over the course of the experiment in group A. In groups B and C,  $K_{fc}$  increased as well, but not to the degree seen in group A lungs. A statistically significant enhancement of  $K_{fc}$  is seen in group A lungs compared with group B and C lungs.

## HALOTHANE-OXIDANT INTERACTIONS IN THE RABBIT LUNG

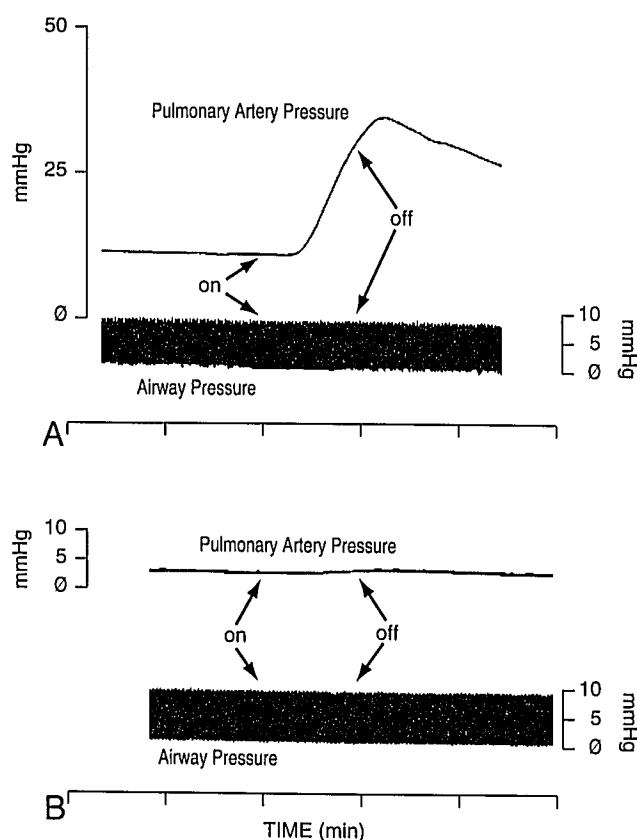

Fig. 2. Sample traces from representative experiments in which lungs were perfused with 2.5 mM  $\text{Ca}^{2+}$  (A) or  $\text{Ca}^{2+}$ -free buffer (B). On, off = onset, offset of *t*-bu-OOH infusion, respectively. At no time was there a significant change in  $P_{pa}$  in the lungs perfused with  $\text{Ca}^{2+}$ -free Krebs-Henseleit buffer solution.

Although the ratio of wet to dry weight was greater in group A ( $14.3 \pm 0.7$ ) than in group C ( $12.1 \pm 1.1$ ,  $P < 0.05$ ) lungs, no difference was apparent between group B ( $13.2 \pm 0.2$ ) and group C.

In all lungs, little thromboxane was found in the pulmonary venous effluent in the basal state before injury

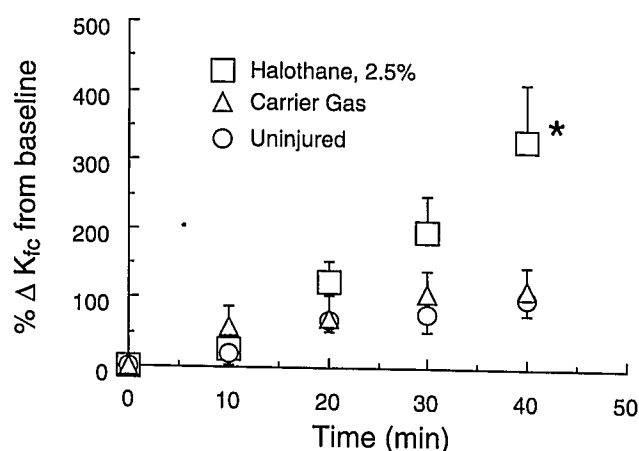

Fig. 3. Graph of percent change in  $K_{fc}$  from baseline versus *t*-bu-OOH infusion number, expressed as time. The difference between the two groups of lungs ventilated with carrier gas was not statistically significant. \*Different from the injured and uninjured groups of lungs ventilated with carrier gas ( $P < 0.03$ ). Vertical bars represent standard error of the mean.

( $6.5 \pm 2$  pg/ml). 6-Keto-PGF $_{1\alpha}$  was present in the pulmonary venous effluent at concentrations more than 30 times those of TxB $_2$  in the basal state before injury ( $227 \pm 19$  pg/ml). As can be seen in figure 4, the ratio of the perfusate concentration of TxB $_2$  to that of 6-keto-PGF $_{1\alpha}$  increased after each infusion of *t*-bu-OOH in the injured lungs. No difference in TxB $_2$ /6-keto-PGF $_{1\alpha}$  between group A and B lungs was detected, although the ratio was greater in groups A and B than in group C lungs ( $P < 0.001$ ) after each oxidant infusion. The mean rate of production of 6-keto-PGF $_{1\alpha}$  was greater in group A than in group C lungs ( $P < 0.011$  for each comparison); however, no difference in 6-keto-PGF $_{1\alpha}$  production was detectable between the lungs in groups A and B or B and C (fig. 5a). The mean rate of production of TxB $_2$  (fig. 5b) was greater in group A lungs compared with group B lungs ( $P < 0.02$ ) after the last

Table 1. Pulmonary Artery Pressure ( $P_{pa}$ ) during the High-flow and Pulmonary Venous Pressure State (Zone 3) Used to Determine Pulmonary Vascular Filtration Coefficient

| Treatment      | Baseline      | Infusion 1    | Infusion 2    | Infusion 3    | Infusion 4    |
|----------------|---------------|---------------|---------------|---------------|---------------|
| 2.5% halothane | $7.6 \pm 0.2$ | $7.3 \pm 0.3$ | $7.6 \pm 0.3$ | $7.6 \pm 0.2$ | $8.5 \pm 0.2$ |
| Carrier gas    | $7.7 \pm 0.5$ | $7.8 \pm 0.5$ | $8.0 \pm 0.6$ | $8.0 \pm 0.5$ | $7.8 \pm 0.6$ |
| No injury      | $8.9 \pm 1.0$ | $8.2 \pm 1.0$ | $8.0 \pm 1.0$ | $8.9 \pm 1.0$ | $9.8 \pm 1.0$ |

Values are mean  $\pm$  SE for  $P_{pa}$  (mmHg). Data were obtained during each of the five zone 3 periods during which flow and pulmonary venous pressure were increased. Baseline values are those obtained during the equilibration period; Infusion 1 values, after the first oxidant infusion; Infusion 2 values, after the second oxidant infusion; and so on. By analysis of variance, no significant differences among groups occurred over the course of the protocol. Neither halothane nor successive infusions of *tert*-butyl-hydroperoxide have an effect on pulmonary vascular resistance or, therefore, vascular cross-sectional area, in this model.

Table 2. Pulmonary Vascular Filtration Coefficient ( $K_{fc}$ ) for the Three Treatment Groups

| Treatment      | Preinjury   | Infusion 1  | Infusion 2  | Infusion 3  | Infusion 4   |
|----------------|-------------|-------------|-------------|-------------|--------------|
| 2.5% halothane | 38.9 ± 7.1  | 43.6 ± 4.4  | 72.0 ± 12.9 | 98.5 ± 18.8 | 141.4 ± 27.2 |
| Carrier gas    | 43.8 ± 12.0 | 58.6 ± 13.4 | 58.1 ± 10.2 | 67.5 ± 7.0  | 68.0 ± 5.6   |
| No injury      | 32.6 ± 7.9  | 37.1 ± 8.9  | 44.3 ± 9.1  | 52.9 ± 11.4 | 63.9 ± 16.0  |

Values are mean ± SE for  $K_{fc}$ , expressed in  $\text{ml} \cdot \text{min}^{-1} \cdot \text{mmHg}^{-1} \cdot 100 \text{ g dry tissue}$  for the three treatment groups in relation to the *tert*-butyl-hydroperoxide infusion number. Preinjury represents the baseline value for  $K_{fc}$ . Note the consistently greater value for  $K_{fc}$  in the injured lungs ventilated with halothane compared with the other two groups of lungs. Although the  $K_{fc}$  in the halothane group is greater ( $P < 0.05$ ) than the preinjury value after the final three oxidant infusions, the difference between the halothane group and the injured carrier gas group does not reach statistical significance until after the final oxidant infusion ( $P < 0.03$ ). Also, the increase in  $K_{fc}$  in the carrier gas and no injury groups after infusion of oxidant or vehicle, respectively, was not significantly greater than baseline.

two infusions of *t*-bu-OOH. Lung production of  $\text{TxB}_2$  (but not of 6-keto-PGF $_{1\alpha}$ ) increased with each infusion of oxidant in both group A ( $P = 0.033$ ) and group B ( $P = 0.002$ ).

## Discussion

We performed these experiments to determine whether, in oxidant-injured lungs, halothane influences an indicator of lung fluid conductance,  $K_{fc}$  (a physiologic effect), and production of arachidonate-derived mediators by the lung (a biochemical effect), when the lungs are challenged repeatedly by an oxidant, *t*-bu-OOH. We hypothesize no cause-effect relationship between these two processes: the relationship between arachidonate-derived mediator production and lung injury has not been demonstrated consistently from species to species. We propose, however, that events common to the maintenance of the integrity of the endothelial barrier and to turnover of arachidonic acid may be affected by halothane and suggest possible targets for this halothane effect. Our findings demonstrate

that injured, isolated lungs perfused with blood- and  $\text{Ca}^{2+}$ -free buffer exhibit a greater increase in  $K_{fc}$  while being ventilated with 2.5% halothane in carrier gas than with carrier gas alone. The higher  $K_{fc}$  in injured lungs ventilated with halothane is accompanied by a more rapid turnover of arachidonic acid in the presence of halothane plus injury than in injury alone upon infusion of *t*-bu-OOH.

The results of earlier studies using *t*-bu-OOH-injured perfused rabbit lungs suggest that the transient pulmonary arterial hypertension induced by the oxidant is mediated by  $\text{TxA}_2$ . When the lungs are perfused with inhibitors of phospholipase  $\text{A}_2$ ,<sup>18</sup> cyclooxygenase,<sup>12</sup> or thromboxane synthetase,<sup>10</sup> the pressor response to *t*-bu-OOH is attenuated, suggesting that inhibition of  $\text{TxA}_2$  release prevents the pressor response to oxidant. Similarly, when the thromboxane analog U46619 is infused, a transient elevation in  $P_{pa}$  is obtained.<sup>19</sup> The pressor response appears to depend on extracellular calcium primarily, because perfusion of the lungs with nominally calcium-free perfusate also results in attenuation of the pressor response.<sup>10</sup> On the other hand,

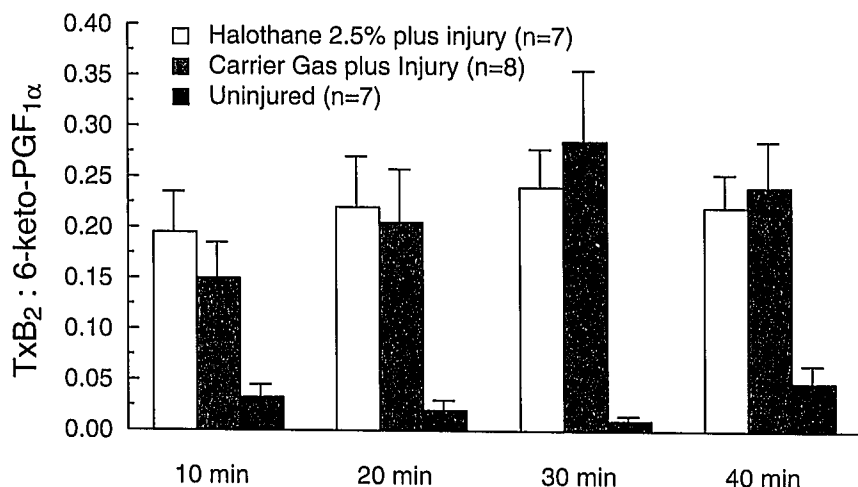

Fig. 4. Plot of the ratio of  $\text{TxB}_2$  to 6-keto-PGF $_{1\alpha}$  for each infusion of *t*-bu-OOH, expressed as time. As previously reported,<sup>4</sup> infusion of *t*-bu-OOH into the pulmonary artery is associated with marked enhancement of the recovery of  $\text{TxB}_2$  from the effluent perfusate relative to 6-keto-PGF $_{1\alpha}$ . Vertical lines represent standard error of the mean.

## HALOTHANE-OXIDANT INTERACTIONS IN THE RABBIT LUNG

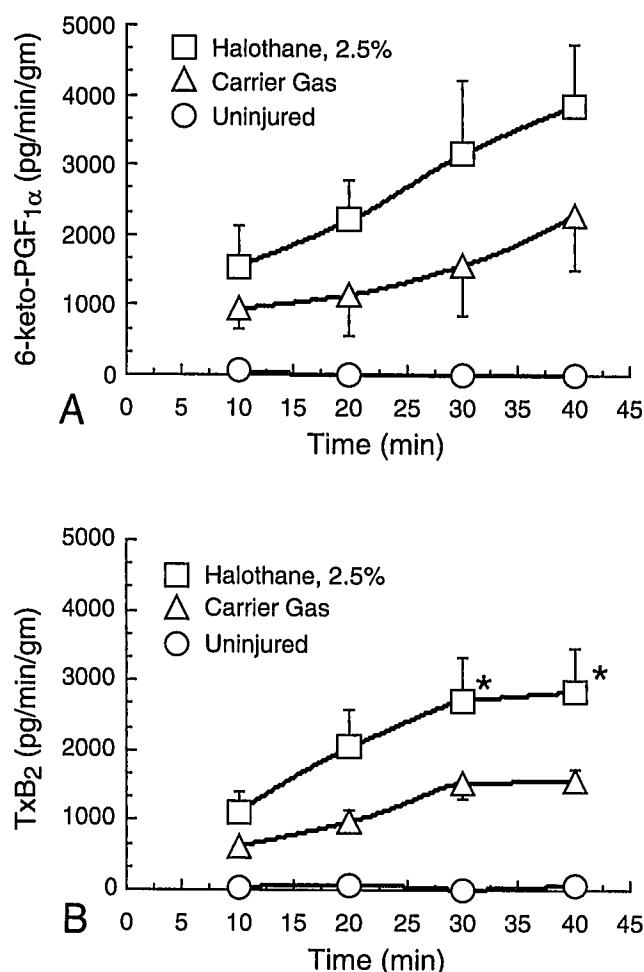

Fig. 5. Plots of the peak rates of production (mean  $\text{pg} \cdot \text{min}^{-1} \cdot \text{g}^{-1}$  dry lung tissue  $\pm$  SE) of 6-keto-PGF<sub>1α</sub> (A) and TxB<sub>2</sub> (B) during infusion of *t*-bu-OOH into the pulmonary artery of the perfused rabbit lung. Vertical bars represent standard error of the mean. Overall, production of TxB<sub>2</sub> was statistically greater in the injured lungs ventilated with halothane than in either of the other groups of lungs ( $P < 0.02$ ). A significant difference was seen by the final infusion of *t*-bu-OOH between injured lungs ventilated with halothane and those ventilated with carrier gas ( $P < 0.02$ ). Although production of 6-keto-PGF<sub>1α</sub> was consistently greater in the injured lungs ventilated with halothane, this difference never reached statistical significance, because of the variability within groups.

the turnover of arachidonic acid in response to *t*-bu-OOH may depend on mobilization of intracellular calcium, as seen in cultured bovine pulmonary vascular endothelium<sup>20</sup> and in perfused lungs,<sup>10</sup> in which arachidonate mediator production occurred during oxidant treatment despite the lack of extracellular calcium. Thus, in the absence of extracellular calcium,

the stimulus (infusion of *t*-bu-OOH) is uncoupled from the response (transient pulmonary hypertension). Although perfusion of the lungs with  $\text{Ca}^{2+}$ -free buffer may alter other physiologic responses to halothane, processes dependent on mobilization of intracellular  $\text{Ca}^{2+}$  may remain unaffected.

The present experiments and others provide evidence for an interaction between halothane and *t*-bu-OOH-stimulated arachidonate-derived mediator production. Volatile anesthetics enhance the pressor response to infused *t*-bu-OOH concomitant with augmented recovery of TxB<sub>2</sub> from the effluent perfusate.<sup>4</sup> Similarly, the results of the present studies indicate further that higher rates of production of TxB<sub>2</sub> (a stable metabolite of TxA<sub>2</sub>, which has vasoconstrictor and thrombogenic properties) and 6-keto-PGF<sub>1α</sub> (the stable metabolite of prostacyclin, which has vasodilator and antithrombogenic properties) occur during infusion of *t*-bu-OOH in halothane-treated lungs relative to the lungs in the other treatment groups. Simultaneously, however, the ratio of the absolute TxB<sub>2</sub> to 6-keto-PGF<sub>1α</sub> concentrations in the pulmonary venous effluent remains similar in the two groups of injured lungs. To achieve higher rates of mediator production while concentration ratios remain unchanged, injured lung tissue must release greater amounts of free arachidonate when ventilated with halothane in carrier gas than when ventilated with carrier gas alone.

The turnover of arachidonic acid requires phospholipase A<sub>2</sub>, which is dependent for activity on the free intracellular  $\text{Ca}^{2+}$  ( $[\text{Ca}^{2+}]_i$ ) concentration. *T*-bu-OOH treatment of cultured bovine pulmonary artery endothelial cells stimulates phospholipase A<sub>2</sub> activity and TxB<sub>2</sub> production, even if the extracellular buffer is nominally  $\text{Ca}^{2+}$ -free.<sup>20</sup> Oxidant-stimulated arachidonic acid turnover and metabolism and intracellular calcium mobilization are well documented phenomena. Exogenously administered hydrogen peroxide has been shown to stimulate release of endothelial cell-derived arachidonic acid.<sup>21</sup> Similarly, Taylor *et al.* have demonstrated that low concentrations of hydroperoxides (such as *t*-bu-OOH) stimulate release of prostacyclin from fibroblasts.<sup>22</sup> Hydrogen peroxide increases  $[\text{Ca}^{2+}]_i$  primarily by stimulating release of  $\text{Ca}^{2+}$  from internal stores,<sup>20,23</sup> most likely *via* phospholipase C-mediated phosphatidylinositol hydrolysis, and subsequent release of inositol triphosphate. Similar mechanisms may apply to the hydroperoxides, such as *t*-bu-OOH, although phospholipase C may not be involved in the *t*-bu-OOH effect.<sup>19,24</sup>

In single rat pulmonary artery endothelial cells, halothane and isoflurane enhanced the release of sequestered intracellular  $\text{Ca}^{2+}$  associated with peroxide injury.<sup>||</sup> Thus, if phospholipase  $\text{A}_2$  activation is  $\text{Ca}^{2+}$ -dependent, then it is conceivable that more of this phospholipase is activated in the presence of halothane than in the presence of carrier gas alone. These considerations may account for the augmented production of  $\text{TxB}_2$  in lungs injured with *t*-bu-OOH after equilibration with halothane. We were not as successful in detecting significant changes in production of 6-keto-PGF $_{1\alpha}$ , primarily because of the larger intragroup variability in 6-keto-PGF $_{1\alpha}$  determinations.

The present study also suggests an interaction between halothane and oxidant on decreasing the integrity of the alveolar-capillary barrier in the lung. In recent *in vitro* experiments, we reported increased sensitivity of halothane-exposed endothelial cell monolayers to injury mediated by stimulated neutrophils.<sup>1</sup> This enhanced injury was not accompanied by a change in the rate of production of hydrogen peroxide by the neutrophils. Similar but less consistent results were observed in monolayers injured with reagent hydrogen peroxide, especially at the highest concentration of halothane studied (2.5%). The present data also demonstrate that, in perfused lungs, an index of the fluid conductance of the pulmonary vascular bed,  $K_{fc}$ ,<sup>14</sup> is increased in injured lungs ventilated with halothane but not significantly in injured lungs ventilated with carrier gas alone, relative to control, uninjured lungs. Although the increase in  $K_{fc}$  in halothane-treated lungs did not achieve statistical significance when compared with injured lungs ventilated with carrier gas alone until after the fourth and final infusion of oxidant,  $K_{fc}$  increases with each *t*-bu-OOH infusion in the former group ( $P = 0.0004$ ) but not in the latter. We hypothesize that the pulmonary vascular endothelium is a likely target of halothane in increasing this injury index, because (1) in *in vitro* studies, endothelial monolayer injury enhancement occurred regardless whether neutrophils were present, in the presence of halothane; (2) the *ex vivo* lungs were perfused with clear buffer, containing few blood cells (hemoglobin concentration was too low to be detected by hemoximeter), thus decreasing the possibility that blood-borne inflammatory

cells contributed to this effect; and (3) microvascular endothelial disruption must occur (due to an increase in capillary "pore" size or number) for fluid movement to occur, such as evidenced by the change in  $K_{fc}$ . In using this isolated lung model, we make certain assumptions about alveolar-capillary membrane characteristics that affect  $K_{fc}$ : (1) the viscosity of the perfusate is assumed to remain constant, (2) the thickness of the capillary wall is assumed not to change after the initial period of equilibration, and (3) the surface area of the perfused capillary bed also is assumed to remain constant and similar among the three treatment groups because, as noted previously (table 1), no differences in perfusion pressure under baseline or zone 3 conditions occurred among the three groups.

We acknowledge that the response of the lung as a whole to oxidant may be altered in the presence of nominally  $\text{Ca}^{2+}$ -free perfusate. Indeed, endothelial cell monolayers bathed in 100 nM  $\text{Ca}^{2+}$  buffer exhibit alterations in shape, marked by rounding and loss of spreading, compared to cells bathed in 1.8 mM  $\text{Ca}^{2+}$  buffer.<sup>||</sup> Thus, in nominally  $\text{Ca}^{2+}$ -free perfusate, lungs may exhibit enhanced fluid transfer from the intravascular to the extravascular space because of diminished cell-cell contact and enlargement of pore size.<sup>25</sup> These considerations partially may explain the 10-fold greater  $K_{fc}$  seen in our experimental preparation, compared to that noted by Matalon and Cesar in rabbit lungs perfused with colloid-containing physiologic buffer.<sup>15</sup> Another difference between our experimental preparation and that described by Matalon and Cesar, which may partially contribute to the greater  $K_{fc}$  in our model, is the absence of colloid in the perfusate used in our experiments.<sup>25</sup> We attempted to perfuse lungs with colloid (bovine serum albumin)-containing buffer in developmental stages of the model, but were unable to obtain a stable system.

Although we detected differences in  $K_{fc}$  among the three groups of lungs, our data for lung wet/dry ratios did not show parallel changes consistently. The mean wet/dry ratio in the uninjured lungs was less than in either of the other two groups, but there was no difference between the two groups of injured lungs. The lack of agreement between these two methods of quantifying lung injury implies that the wet/dry ratio and  $K_{fc}$  are neither directly nor simply related. The wet/dry ratio represents a static determination of the accumulation of fluid throughout the lung, not only in the interstitium but also in the alveolar space. In principle,  $K_{fc}$ , as described by Taylor and Townsley, is "a

|| Shayevitz JR, Varani J, Knight PR: Modulation of intracellular calcium fluxes in oxidant-injured endothelial cells by halothane and isoflurane (abstract). *ANESTHESIOLOGY* 73:A341, 1990.

## HALOTHANE-OXIDANT INTERACTIONS IN THE RABBIT LUNG

permeability parameter describing the volume-flow characteristics of the capillary wall."<sup>14</sup>  $K_{fc}$  directly depends on the number of holes present in this wall, the size of the holes, and the surface area available for fluid exchange. Thus, a few large holes in lungs with a given capillary surface area may not have as great an effect on  $K_{fc}$  as many smaller leaks across the same size surface. Lung wet/dry weight ratio, however, may change the same amount under these different conditions, especially if the capillary surface area remains unchanged.<sup>14</sup> Thus, the discrepancy between the data for wet/dry weight ratio and  $K_{fc}$  may reflect a difference in the quality of injury between the two groups of injured lungs, if we assume no effect of halothane on the volume-flow characteristics of the microvascular bed.<sup>14</sup> Halothane, perhaps by increasing the sensitivity of a broader spectrum of microvascular endothelium to the injury incurred by *t*-bu-OOH (as indicated by our *in vitro* results<sup>1</sup>), may affect the distribution of oxidant-mediated injury. In lungs ventilated with carrier gas alone, injury may occur in limited, localized regions, thus creating a few larger holes. Injury in lungs ventilated with halothane may be more diffuse and severe than injury in carrier gas-ventilated lungs, thus creating a larger number of smaller holes. In addition, ventilation with halothane may act to increase the vascular capacitance of the isolated lung, which also may be reflected as a higher  $K_{fc}$ ; but this is arguable for several reasons: (1) the baseline and zone 3  $P_{pa}$  in all groups of lungs were similar; (2) the preinjury  $K_{fc}$  in the three groups of lungs was the same; (3) the reactivity of the pulmonary vasculature in response to numerous stimuli in lungs perfused with  $Ca^{2+}$ -free buffer is markedly attenuated, if not completely eliminated<sup>10</sup>; and (4) with the change in venous pressure and flow used to measure  $K_{fc}$ , the effect of increased vascular capacitance on lung perfusate uptake is short-lived, usually lasting not longer than the first 30 s after these parameters are changed.<sup>15,25</sup>

The augmented  $TxB_2$  production and simultaneous injury enhancement in halothane-exposed lungs may be related to an effect of halothane on peroxide-mediated mobilization of intracellular  $Ca^{2+}$ . In several cell lines (both endothelial and epithelial) known to form tight junctions, exposure to oxidants has been shown to induce cell contraction and separation of tight junctions and an increase in electrical conductance across cell monolayers.<sup>26-29</sup> This effect is accompanied by disruption of the F-actin cytoskeleton,<sup>26</sup> mobilization of intracellular  $Ca^{2+}$ ,<sup>27</sup> and a decrease in intracellular

ATP levels.<sup>27-29</sup> Cytoskeletal disruption with resultant loss of tight junctions (and increased permeability of monolayers) may be mediated by oxidant-stimulated intracellular  $Ca^{2+}$  mobilization.<sup>26,27</sup> Thus, by promoting intracellular  $Ca^{2+}$  mobilization in oxidant-injured endothelium, halothane may contribute to the enhancement of permeability ( $K_{fc}$ ) simultaneous with stimulation of arachidonic acid turnover in the perfused lungs described in the present experiments.

*Ex vivo* perfused rabbit lungs ventilated with halothane simultaneously exhibited evidence of greater fluid conductance across the pulmonary capillary bed and production of  $TxA_2$  when challenged with organic oxidant than did lungs ventilated with carrier gas. Both of these effects may be mediated by halothane-related enhancement of intracellular endothelial  $Ca^{2+}$  mobilization stimulated by intrapulmonary infusion of oxidant. These effects of halothane in perfused lungs may broaden our understanding of volatile anesthetic interactions with acute inflammatory lung injury resulting from such processes as oxygen toxicity, adult respiratory distress syndrome, multiple organ failure syndrome, and acid aspiration.

## References

1. Shayevitz JR, Varani J, Ward PA, Knight PR: Halothane and isoflurane increase pulmonary artery endothelial cell sensitivity to oxidant-mediated injury. *ANESTHESIOLOGY* 74:1067-1077, 1991
2. Coleman EA, Rutter T, Tait AR, Johnson KJ, Knight PR: The effect of duration of anesthetic exposure on pulmonary acid injury (abstract). *ANESTHESIOLOGY* 75:A998, 1991
3. Penna AM, Johnson KJ, Camilleri J, Knight PR: Alterations in influenza A virus specific immune injury in mice anesthetized with halothane or ketamine. *Intervirology* 31:188-196, 1990
4. Shayevitz JR, Traystman RJ, Adkinson NF, Sciuto AM, Gurtner GH: Inhalation anesthetics augment oxidant-induced pulmonary vasoconstriction: Evidence for a membrane effect. *ANESTHESIOLOGY* 63:624-632, 1985
5. Halsey MJ: Mechanisms of general anesthesia, Anesthetic Uptake and Action. Edited by Eger EI. Baltimore, Williams & Wilkins, 1981, pp 45-76
6. Hyman AL, Spannhake EW, Kadowitz PJ: Prostaglandins and the lung. *Am Rev Respir Dis* 117:111-136, 1978
7. Chang SW, Voelkel NF: Inflammatory mediator effects on pulmonary blood flow, edema, and the vascular endothelium, *Mediators of Pulmonary Inflammation*. Edited by Bray MA, Anderson WH. New York, Marcel Dekker, 1991, pp 403-453
8. Farrukh IS, Michael JR, Gurtner GH: Agents that increase cAMP prevent pulmonary vasoconstriction and edema in oxidant lung damage. *J Appl Physiol* 62:47-54, 1987
9. Farrukh IS, Gurtner GH, Terry PB, Tohidi W, Yang JN, Adkinson NF Jr, Michael JR: Effect of pH on pulmonary vascular tone, reactivity, and arachidonate metabolism. *J Appl Physiol* 67:445-452, 1989

10. Farrukh IS, Michael JR, Summer WR, Adkinson NF, Gurtner GH: Thromboxane-induced pulmonary vasoconstriction: Involvement of calcium. *J Appl Physiol* 58:34-44, 1985
11. Voelkel NF, Stenmark KR, Reeves JT, Mathias MM, Murphy RC: Actions of lipoxygenase metabolites in rat lungs. *J Appl Physiol* 57:860-867, 1984
12. Gurtner GH, Knoblauch A, Smith PL, Sies H, Adkinson NF: Oxidant- and lipid-induced pulmonary vasoconstriction mediated by arachidonic acid metabolites. *J Appl Physiol* 55:949-954, 1983
13. Borg DC, Schaich KM: Iron and hydroxyl radicals in lipid oxidation: Fenton reactions in lipid and nucleic acids co-oxidized with lipid, Oxy-radicals in Molecular Biology and Pathology. Edited by Cerutti PA, Fridovich I, McCord JM. New York, Alan R. Liss, 1988, pp 427-441
14. Taylor AE, Townsley MI: Assessment of oxygen radical tissue damage, *Physiology of Oxygen Radicals*. Edited by Taylor AE, Matalon S, Ward PA. Bethesda, American Physiological Society, 1986, pp 19-38
15. Matalon S, Nickerson PA: Alterations in mammalian blood-gas barrier exposed to hyperoxia, *Physiology of Oxygen Radicals*. Edited by Taylor AE, Matalon S, Ward PA. Bethesda, American Physiological Society, 1986, pp 55-69
16. Matalon S, Cesar MA: Effects of 100% oxygen breathing on the capillary filtration coefficient in rabbit lungs. *Microvasc Res* 29:70-80, 1985
17. Fitzpatrick FA, Gorman RR, McGuire JC, Kelley RC, Wynalda MA, Sun FF: A radioimmunoassay for thromboxane B<sub>2</sub>. *Anal Biochem* 82:1-7, 1977
18. Shayevitz JR, McShane AJ, Traystman RJ, Gurtner GH: Mepacrine attenuates pulmonary vasoreactivity in rabbits. *J Appl Physiol* 66:1921-1926, 1989
19. McShane AJ, Crowley K, Shayevitz JR, Michael JR, Adkinson NF, Traystman RJ, Gurtner GH: Barbiturate anesthetics inhibit thromboxane-, potassium-, but not angiotensin-induced pulmonary vasoconstriction. *ANESTHESIOLOGY* 70:775-779, 1989
20. Chakraborti S, Gurtner GH, Michael JR: Oxidant-mediated activation of phospholipase A<sub>2</sub> in pulmonary endothelium. *Am J Physiol* 257:L430-L437, 1989
21. Harlan JM, Callahan KS: Role of hydrogen peroxide in the neutrophil-mediated release of prostacyclin from endothelial cells. *J Clin Invest* 74:442-448, 1984
22. Taylor L, Menconi MJ, Polgar P: The participation of hydroperoxides and oxygen radicals in the control of prostaglandin synthesis. *J Biol Chem* 258:6855-6857, 1983
23. Hyslop PA, Hinshaw DB, Schraufstatter IU, Sklar LA, Spragg RG, Cochrane CG: Intracellular calcium homeostasis during hydrogen peroxide injury to cultured P388D1 cells. *J Cell Physiol* 129:356-366, 1986
24. Rooney TA, Renard DC, Sass EJ, Thomas AP: Oscillatory cytosolic calcium waves independent of stimulated inositol 1,4,5-trisphosphate formation in hepatocytes. *J Biol Chem* 266:12272-12282, 1991
25. Taylor AE, Drake RE: Fluid and protein movement across the pulmonary microcirculation, *Lung Water and Solute Exchange*. Edited by Staub NC. New York, Marcel Dekker, 1978, pp 129-166
26. Welsh MJ, Shasby DM, Husted RM: Oxidants increase paracellular permeability in a cultured epithelial cell line. *J Clin Invest* 76:1155-1168, 1985
27. Hinshaw DB, Burger JM, Armstrong BC, Hyslop PA: Mechanism of endothelial cell shape change in oxidant injury. *J Surg Res* 46:339-349, 1989
28. Varani J, Phan SH, Gibbs DF, Ryan US, Ward PA: H<sub>2</sub>O<sub>2</sub>-mediated cytotoxicity of rat pulmonary endothelial cells: Changes in ATP and purine products and effects of protective interventions. *Lab Invest* 63:683-689, 1990
29. Spragg RG, Hinshaw DB, Hyslop PA, Schraufstatter IU, Cochrane CG: Alterations in ATP and energy charge in cultured endothelium and P388D1 cells following oxidant injury. *J Clin Invest* 76:1471-1476, 1985
